# Supplementary material for: Deep Sequencing Analysis Identified a Specific Subset of Mutations Distinctive of Biphasic Malignant Pleural Mesothelioma
Source: MDPI journal article supplement (doi:10.3390/cancers12092454), 2020-08-29
Supplement: s1 [file s1]

FIGURE S1

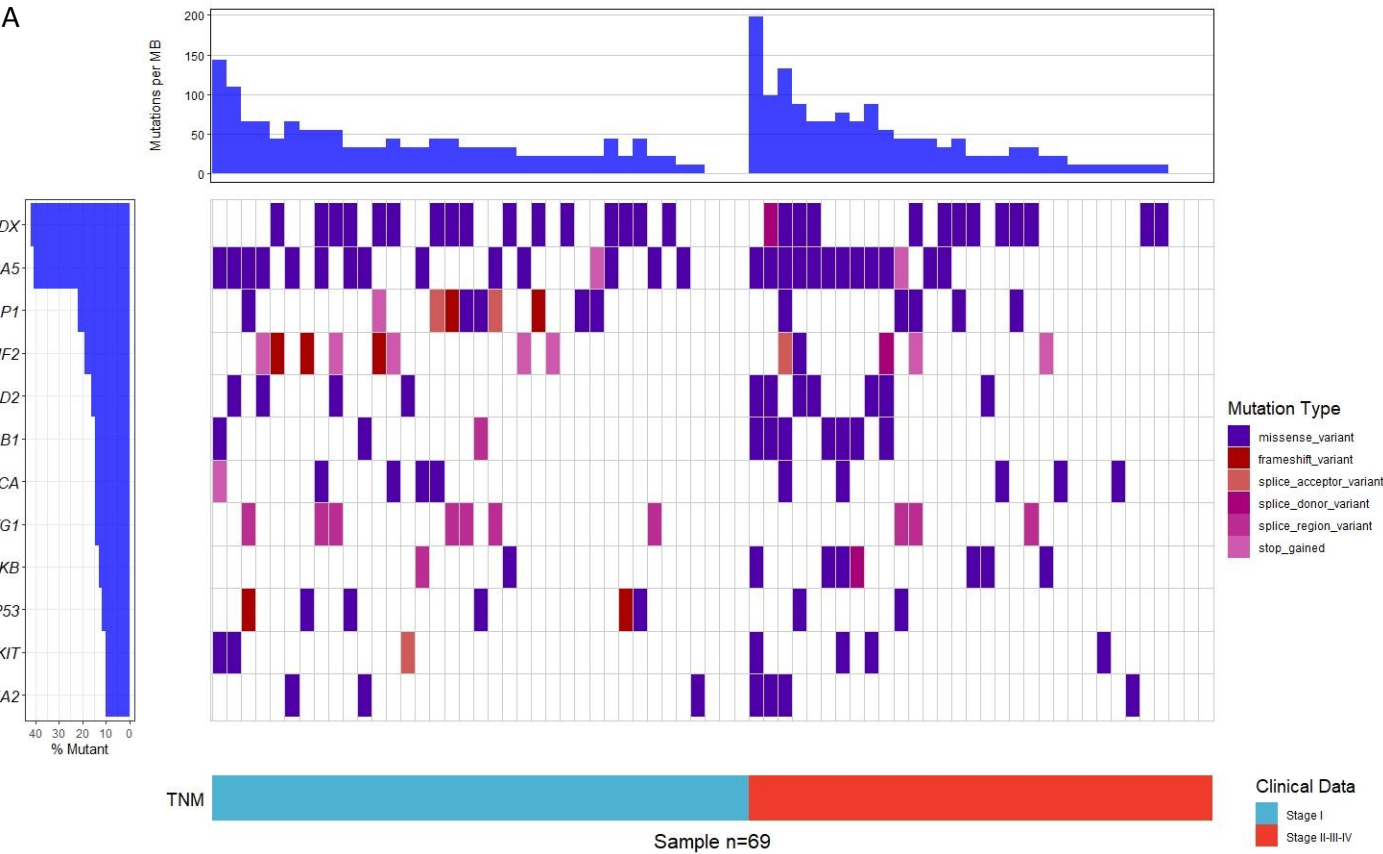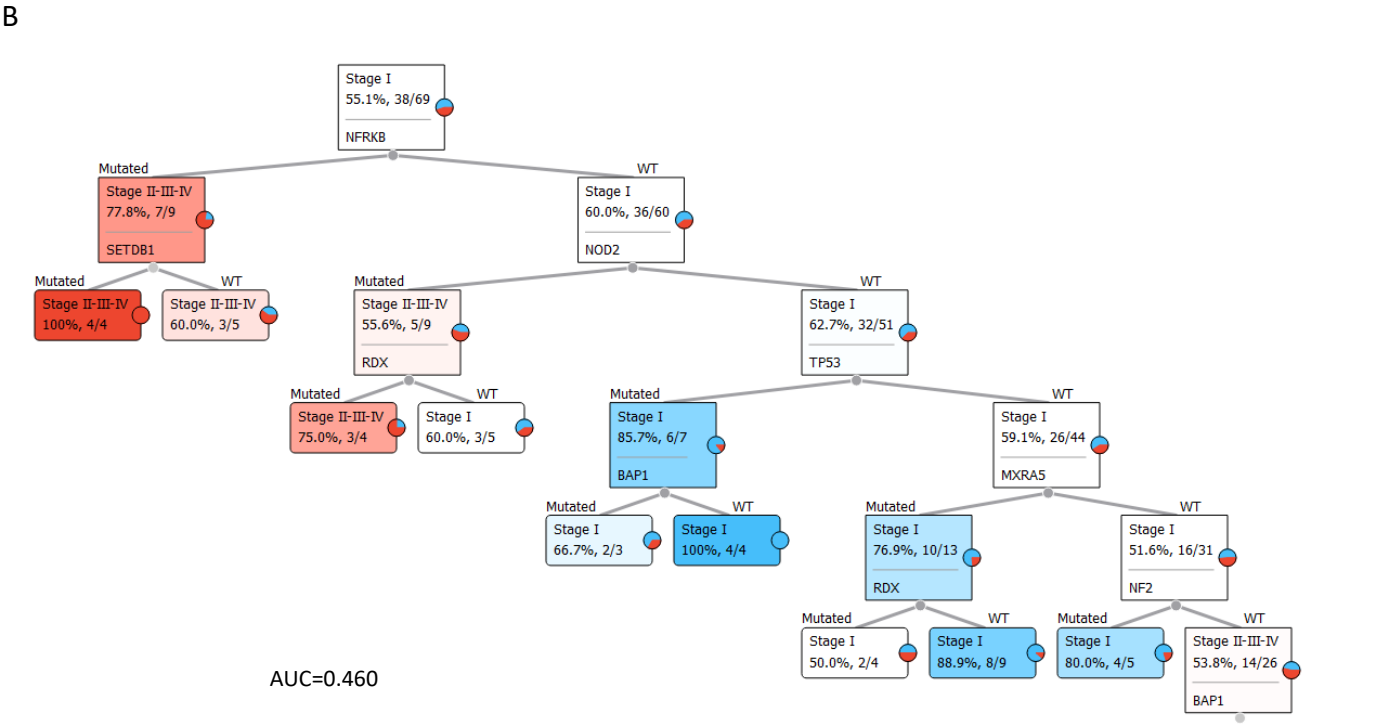

FIGURE S1. Analysis of the impact of co-occurring mutations on tumor stage.

- A. Waterfall plot representing the gene mutations co-occurred in each patient (columns). Patients were subdivided by TNM stage as indicated by lower horizontal bar.
- B. Decision tree showing the role of gene mutations co-occurrence in the classification of MPM by stage. AUC of the method was calculated by a 10-fold cross validation.
