# Supplementary material for: Deep Sequencing Analysis Identified a Specific Subset of Mutations Distinctive of Biphasic Malignant Pleural Mesothelioma
Source: MDPI journal article supplement (doi:10.3390/cancers12092454), 2020-08-29
Supplement: s1 [file s1]

FIGURE S2

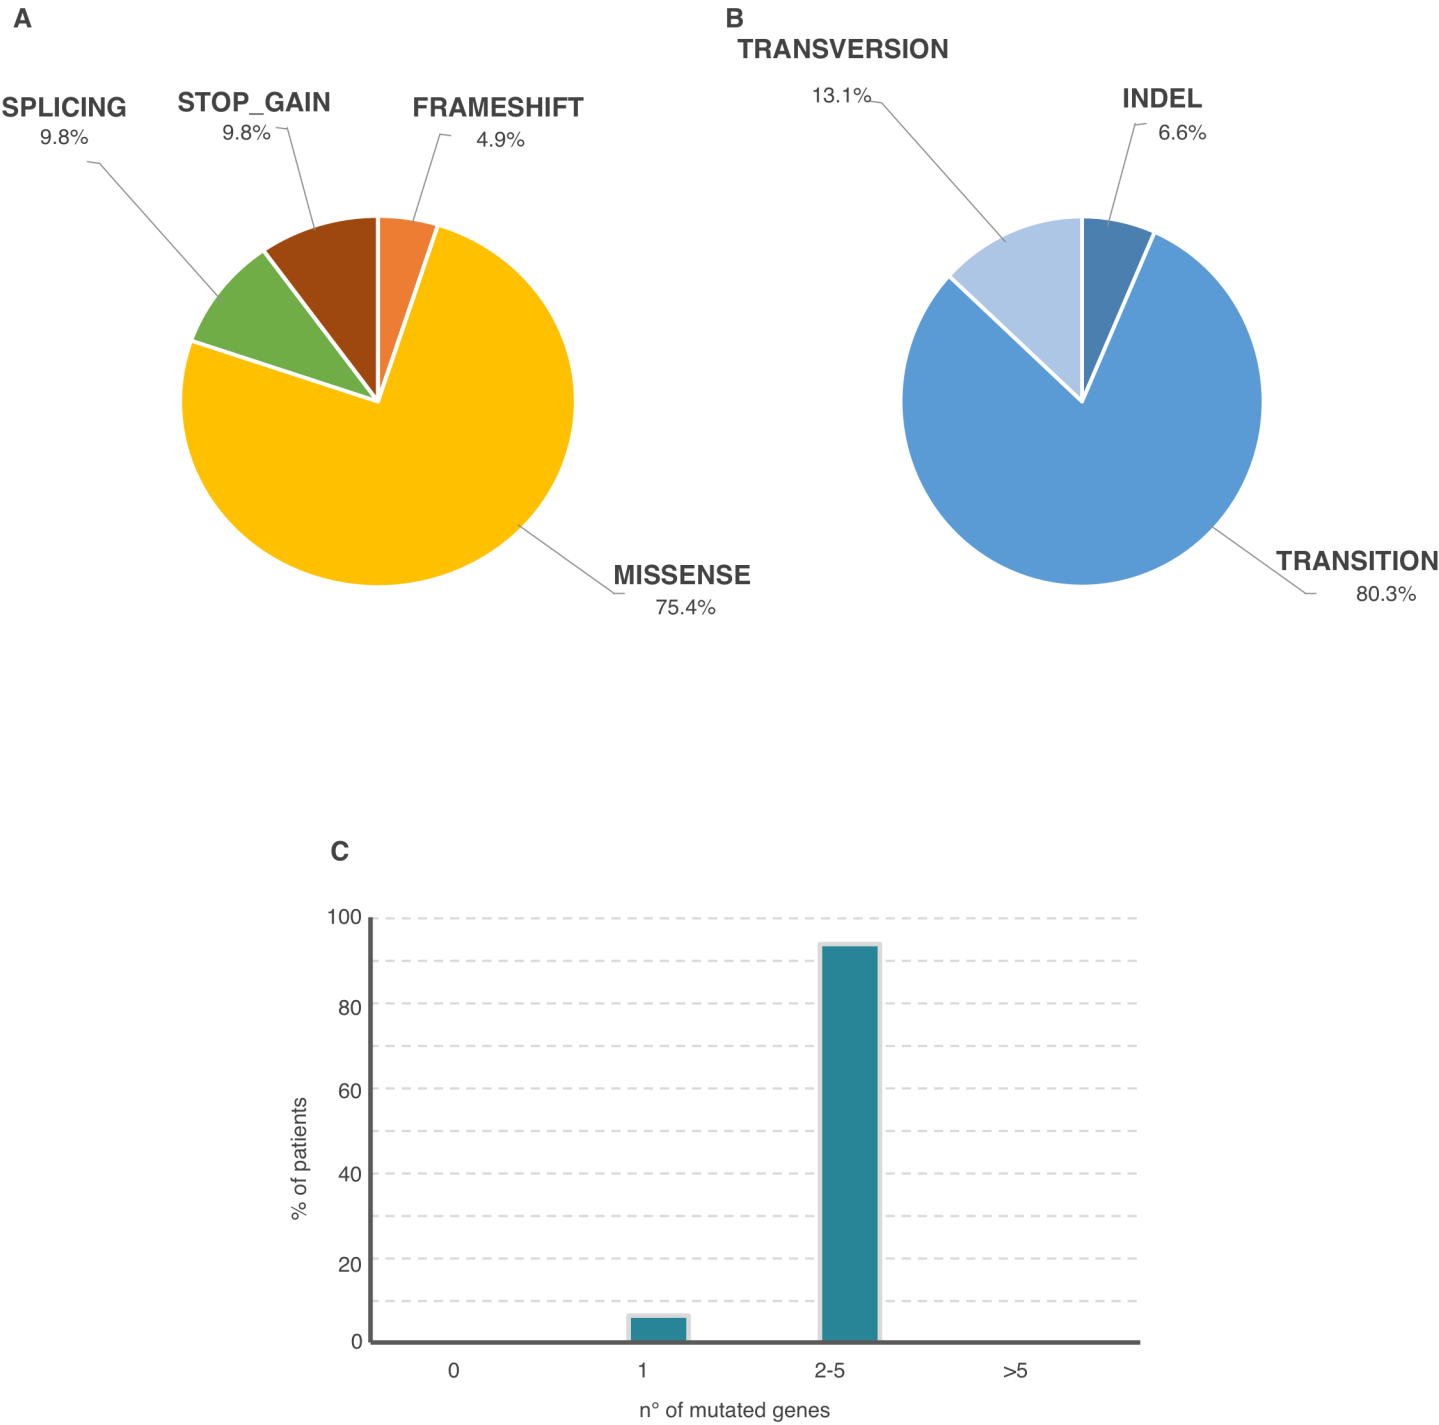

FIGURE S2. Mutational status of a validation cohort of 16 biphasic mesotheliomas.

- A. Distribution of mutation types.
- B. Distribution of mutation coding effects.
- C. Distribution of the number of mutated genes per patient.
