# Supplementary material for: Deep Sequencing Analysis Identified a Specific Subset of Mutations Distinctive of Biphasic Malignant Pleural Mesothelioma
Source: Cancers (Basel). 2020 Aug 29;12(9):2454. doi: 10.3390/cancers12092454 (PMC7563974; doi:10.3390/cancers12092454)
Supplement: Supplementary file 1 [file cancers-12-02454-s001.zip]

Archive with 10 entries (10 files):
- Supplementary files/~$ble S1.docx
- Supplementary files/~$ble S2.doc
- Supplementary files/Figure S1.pdf
- Supplementary files/Figure S2.pdf
- Supplementary files/Table S1.docx
- Supplementary files/Table S2.doc
- Supplementary files/Table S3.docx
- Supplementary files/Table S4.docx
- Supplementary files/Table S5.docx
- Supplementary files/Table S6.docx
